# Supplementary material
Source: PubMed Central journal article supplement (PMC2806762)
Supplement: 0911790107_pnas.200911790SI.pdf [file 0911790107_pnas.200911790SI.pdf]

# Supporting Information

Tresguerres et al. 10.1073/pnas.0911790107

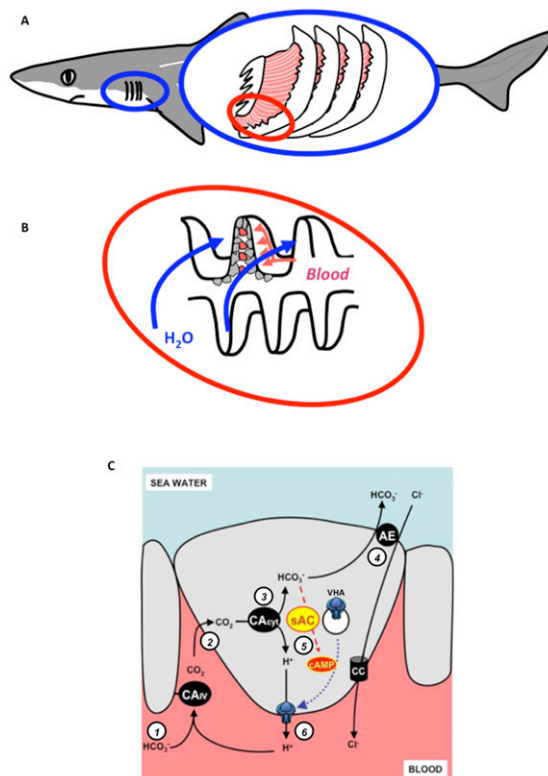

**Fig. S1.** Dogfish gill and VHA translocation in response to blood alkalosis. (A) Dogfish have four branchial arches (plus one hemibranch, not drawn) at each side. (B) Each gill has several filaments with finger-like protrusions (lamellae). Blood and seawater flow in a countercurrent fashion. (C) Subset of cells in the gill epithelium is VHA-rich,  $H^+$ -absorbing, and  $HCO_3^-$ -secreting. (1) During increased blood  $HCO_3^-$  and pH,  $HCO_3^-$  in blood is dehydrated into  $CO_2$  by extracellular CA ( $CA_{IV}$ ) (1). (2)  $CO_2$  enters the VHA-rich cells. (3) Once inside,  $CO_2$  is hydrated back into  $H^+$  and  $HCO_3^-$  by intracellular CA ( $CA_{cyt}$ ) (2, 3). (4)  $HCO_3^-$  is secreted to seawater in exchange for chloride, probably via a Pendrin-like anion exchanger (4). (5) Elevated intracellular  $HCO_3^-$  activates sAC to generate cAMP, which triggers the microtubule-dependent translocation of VHA (blue icon) containing cytoplasmic vesicles to the basolateral membrane. (6) Basolateral VHA reabsorbs  $H^+$  into the blood to counteract the original alkalosis (5–7). The positive current is probably neutralized by a transepithelial chloride conductance (CC).

- Gilmour KM, Bayaa M, Kenney L, McNeill B, Perry SF (2007) Type IV carbonic anhydrase is present in the gills of spiny dogfish (*Squalus acanthias*). *Am J Physiol* 292:R556–R567.
- Tresguerres M, Parks SK, Wood CM, Goss GG (2007)  $V-H^+$ -ATPase translocation during blood alkalosis in dogfish gills: Interaction with carbonic anhydrase and involvement in the postfeeding alkaline tide. *Am J Physiol* 292:R2012–R2019.
- Perry SF, Gilmour KM (2006) Acid-base balance and  $CO_2$  excretion in fish: unanswered questions and emerging models. *Respir Physiol Neurobiol* 154:199–215.
- Piermarini PM, Verlander JW, Royaux IE, Evans DH (2002) Pendrin immunoreactivity in the gill epithelium of a euryhaline elasmobranch. *Am J Physiol* 283:R983–R992.
- Tresguerres M, Katoh F, Fenton H, Jasinska E, Goss GG (2005) Regulation of branchial  $V-H(+)$ -ATPase,  $Na(+)/K(+)$ -ATPase and NHE2 in response to acid and base infusions in the Pacific spiny dogfish (*Squalus acanthias*). *J Exp Biol* 208:345–354.
- Tresguerres M, Parks SK, Katoh F, Goss GG (2006) Microtubule-dependent relocation of branchial  $V-H^+$ -ATPase to the basolateral membrane in the Pacific spiny dogfish (*Squalus acanthias*): A role in base secretion. *J Exp Biol* 209:599–609.
- Tresguerres M, Parks SK, Wood CM, Goss GG (2007)  $V-H^+$ -ATPase translocation during blood alkalosis in dogfish gills: Interaction with carbonic anhydrase and involvement in the postfeeding alkaline tide. *Am J Physiol* 292:R2012–R2019.

**Table S1. Summary of the statistics used in Table 1**

| Variable    | Treatment effect | Time effect | Interaction effect | Additional test           |
|-------------|------------------|-------------|--------------------|---------------------------|
| pH          | S                | S           | NS                 | Tukey–Kramer planned test |
| $[HCO_3^-]$ | S                | S           | S                  | Bonferroni's posttest     |
| $PCO_2$     | NS               | S           | NS                 | None                      |

All variables were initially analyzed using repeated-measures two-way ANOVA. NS, no statistical significant differences found ( $P \geq 0.05$ ); S, statistical significant differences found ( $P < 0.05$ ).
